# Supplementary material
Source: PubMed Central journal article supplement (PMC3969996)

FIGURE S1

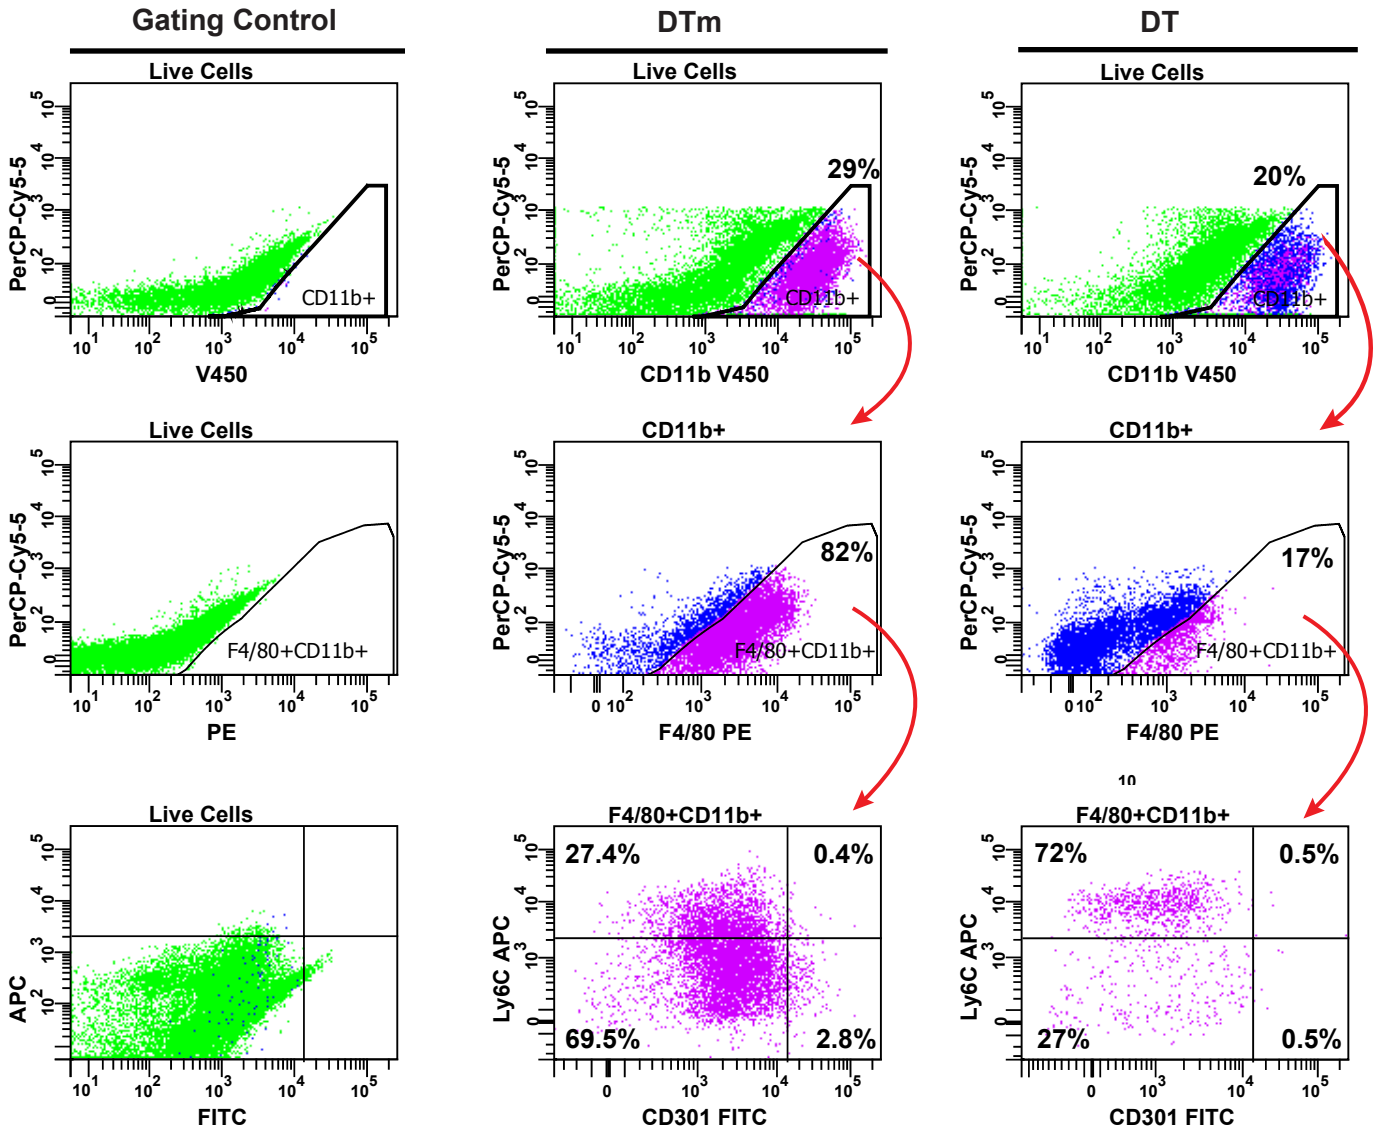

Supplement: mmc1.pdf [file mmc1.pdf]
